# Supplementary material for: Manganese affects the growth and metabolism of Ganoderma lucidum based on LC-MS analysis
Source: PubMed Central journal article supplement (PMC6500383; doi:10.7717/peerj.6846), 2019-05-01

# chavicol

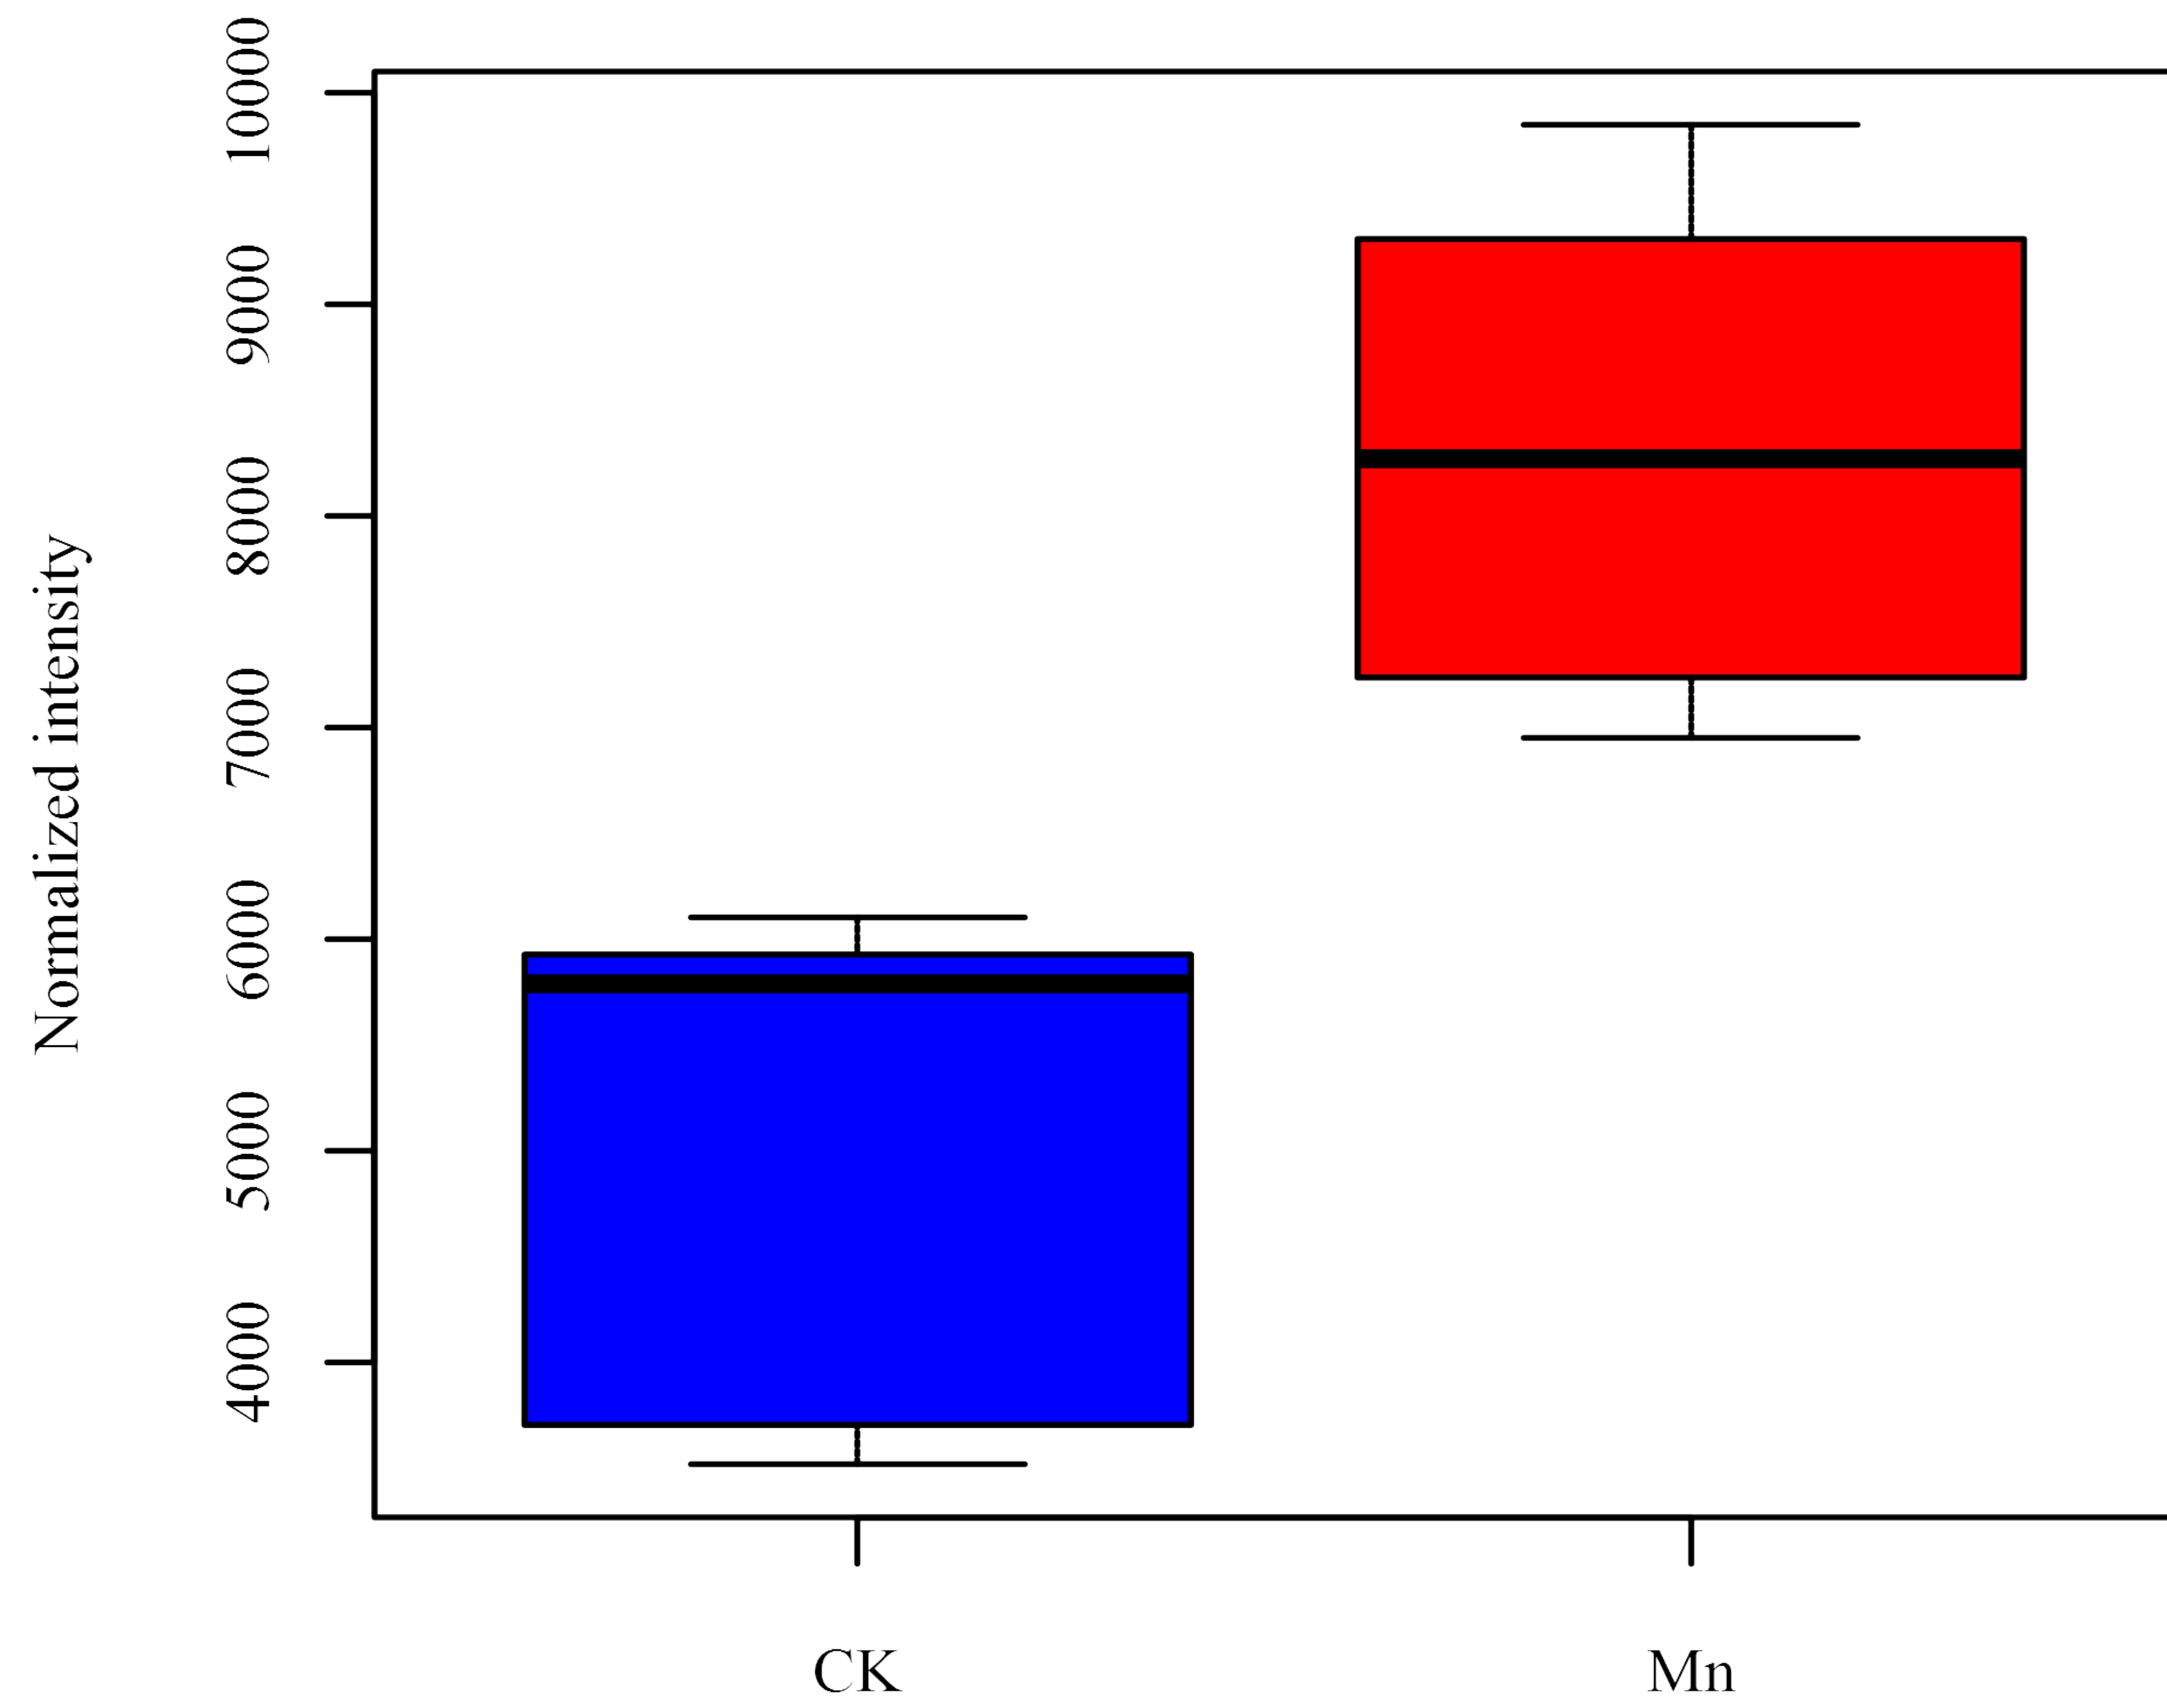

# palmitoyl ethanolamide

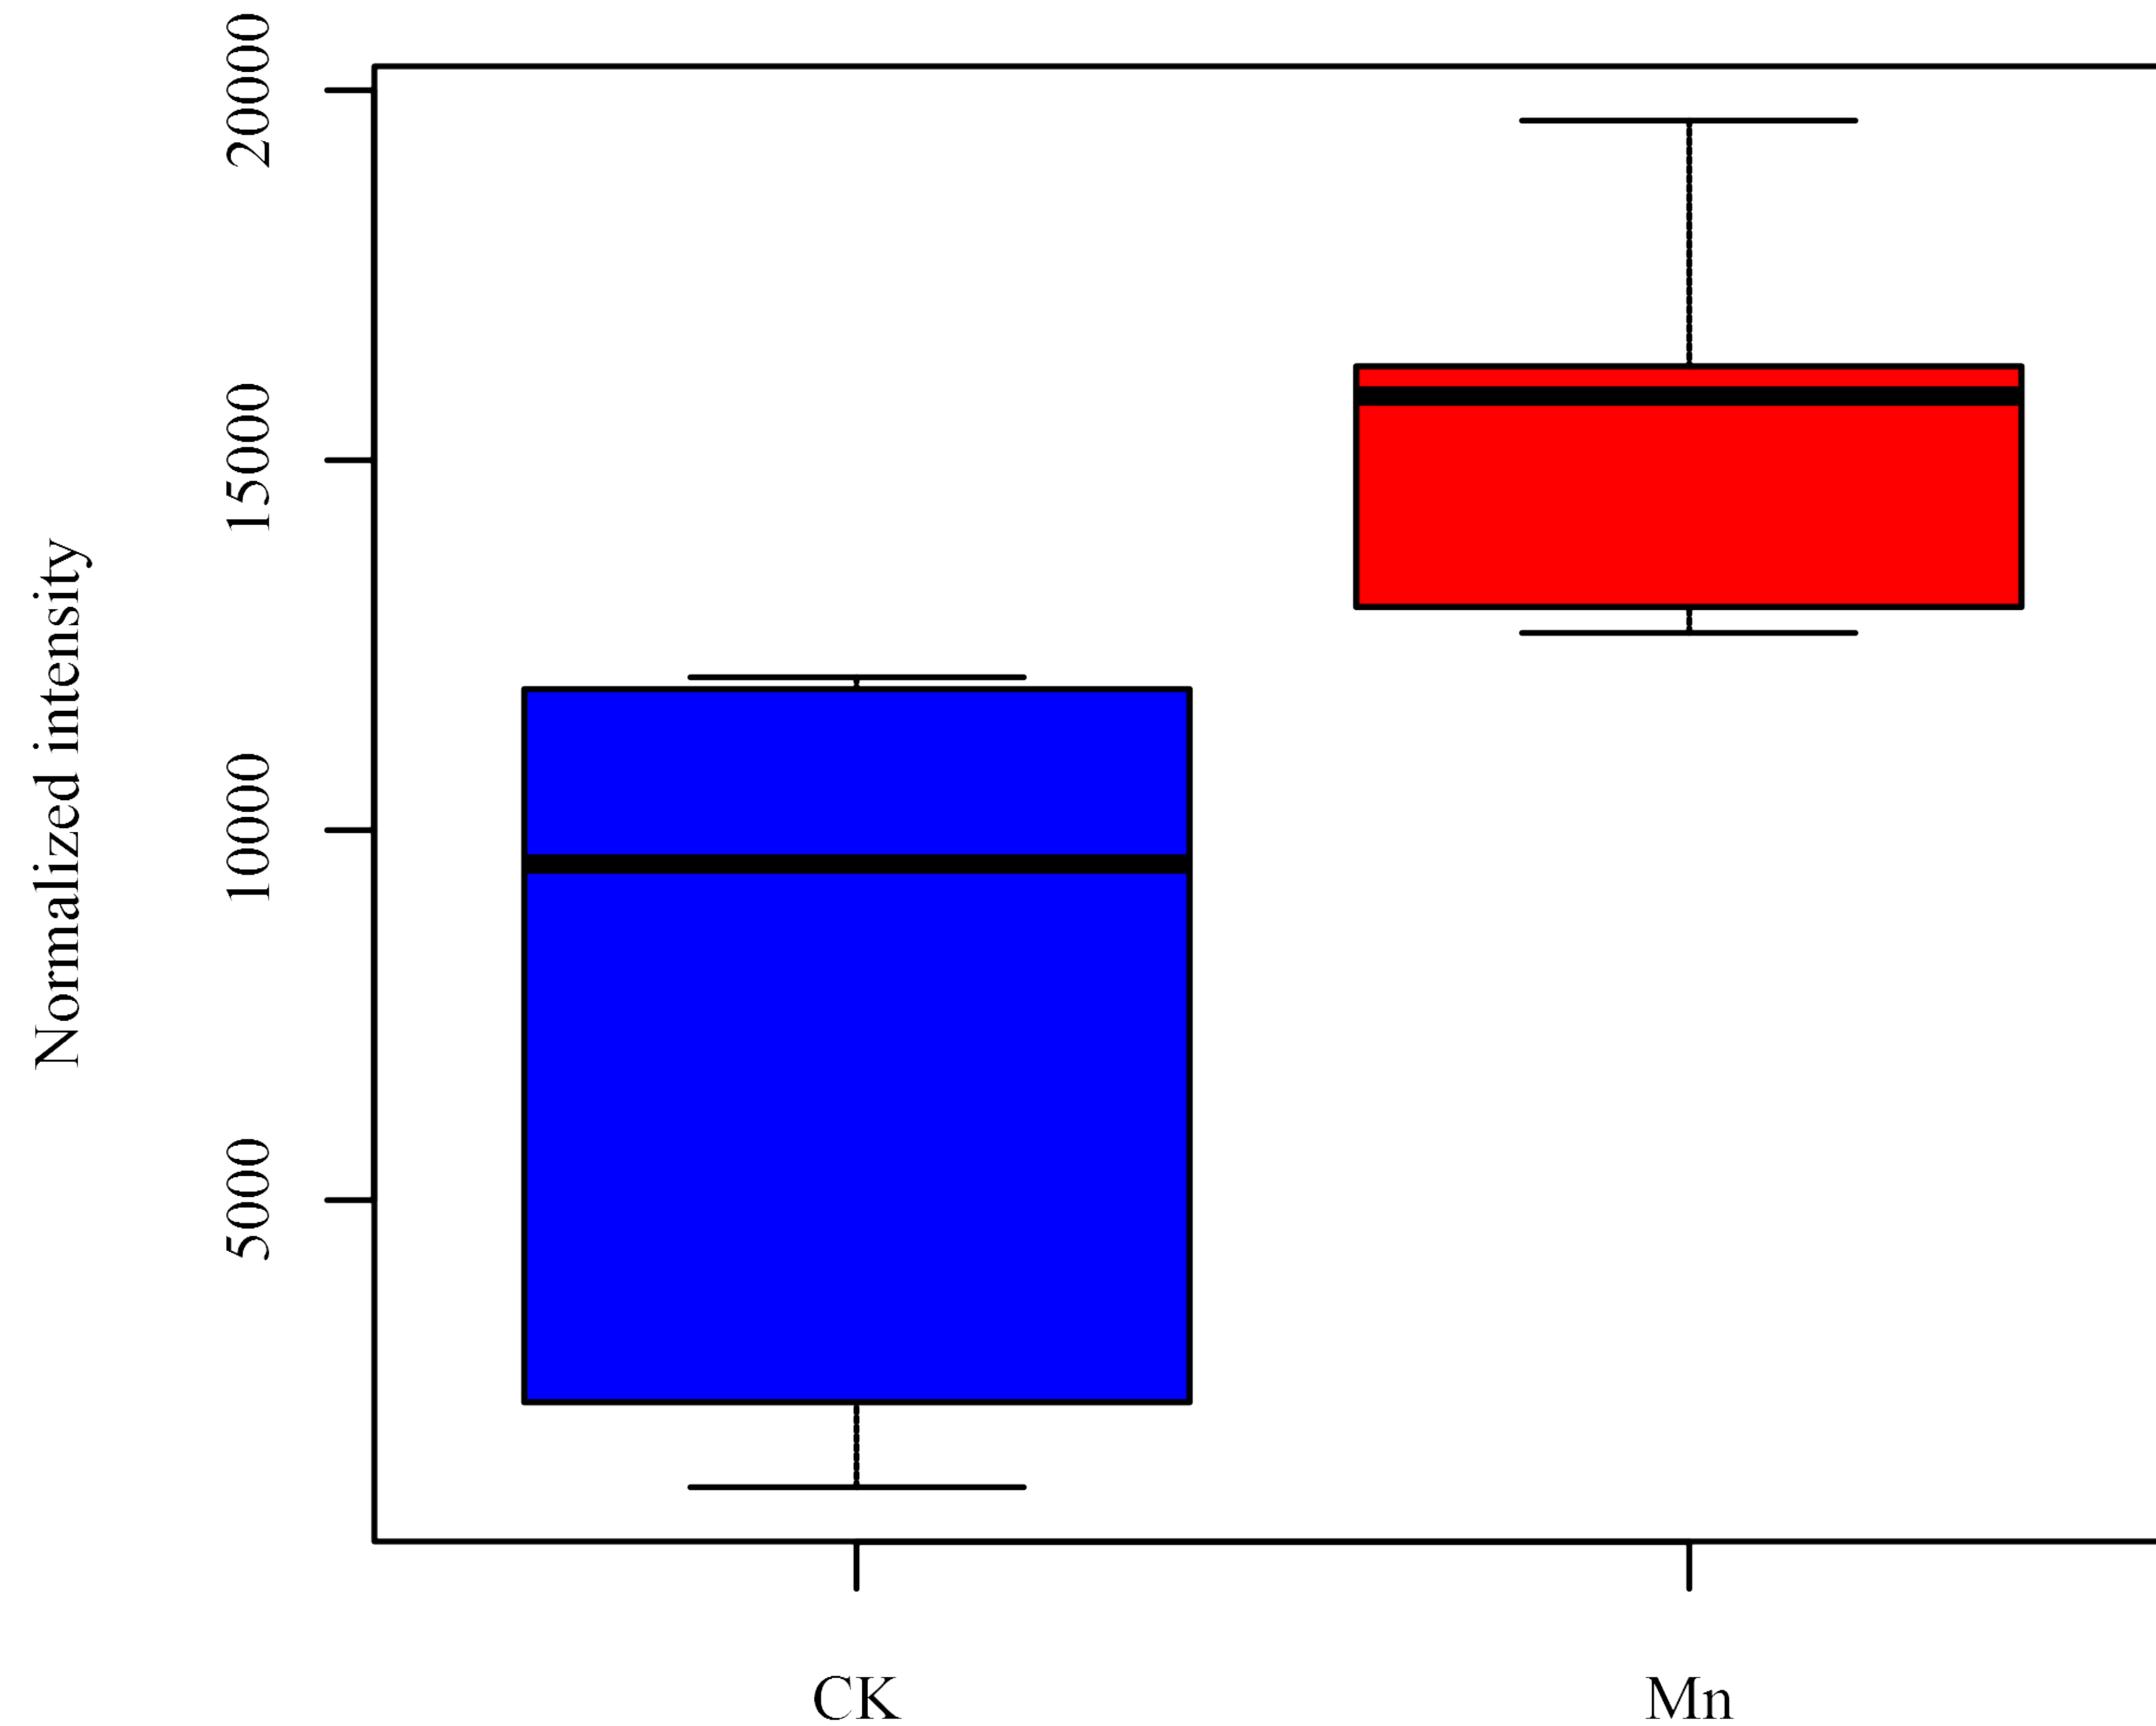

Supplement: peerj-07-6846-s001.pdf [file peerj-07-6846-s001.pdf]
